# Supplementary material for: Synthetic and biological studies on the spiro-mamakone system
Source: Royal Society of Chemistry journal article supplement (doi:10.1039/b812263f), 2008-01-01

## Supplementary Information

### Synthetic and biological studies on the *spiro*-mamakone system

Annabel C. Murphy, Sean R. A. Devenish, Andrew C. Muscroft-Taylor, John W. Blunt  
and Murray H. G. Munro.

<sup>1</sup>H NMR data for all new compounds is given.

**Compound 5:**

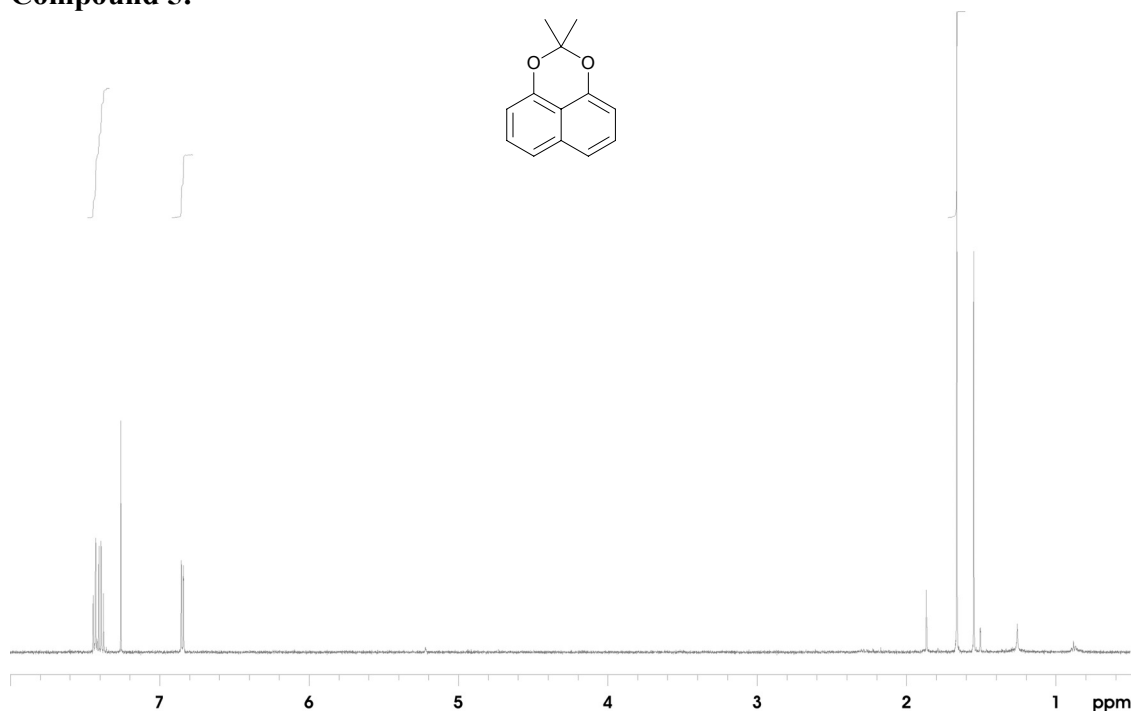

**Compound 6:**

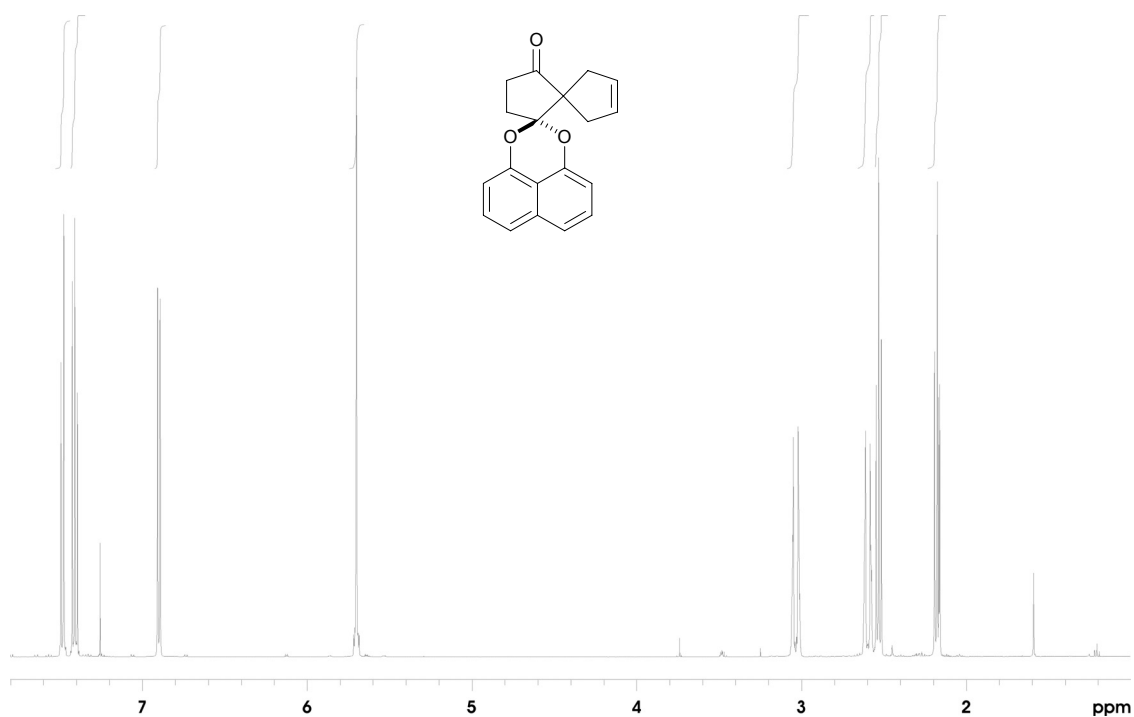

**Compound 7:**

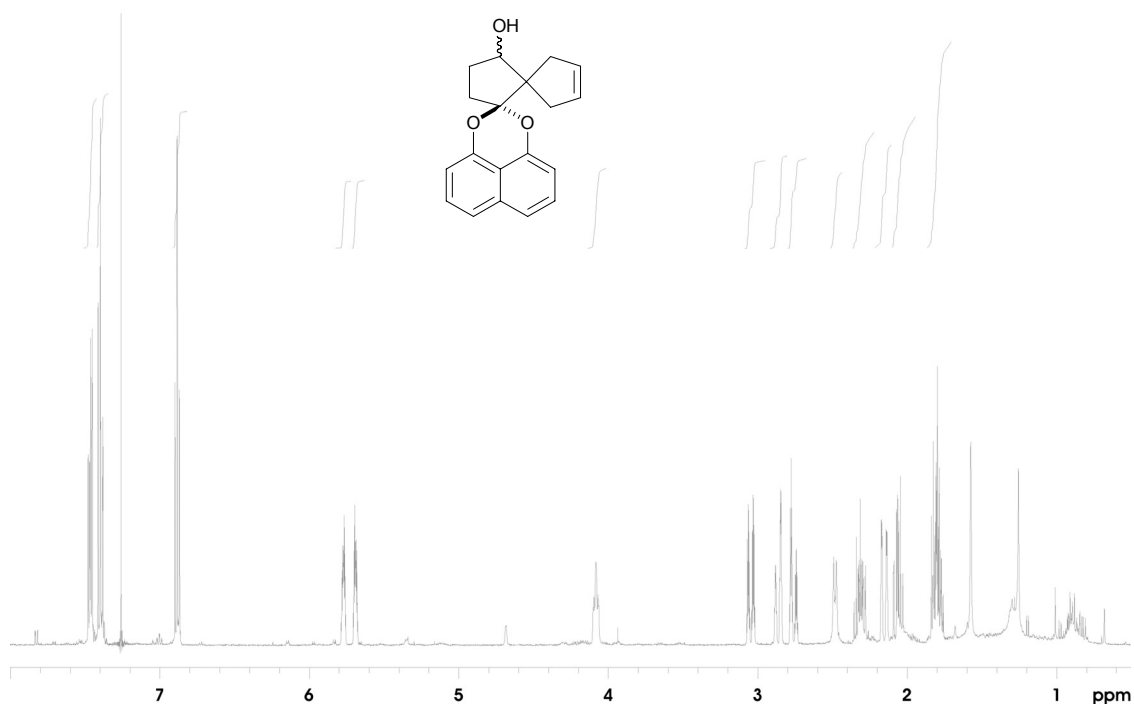

**Compound 8:**

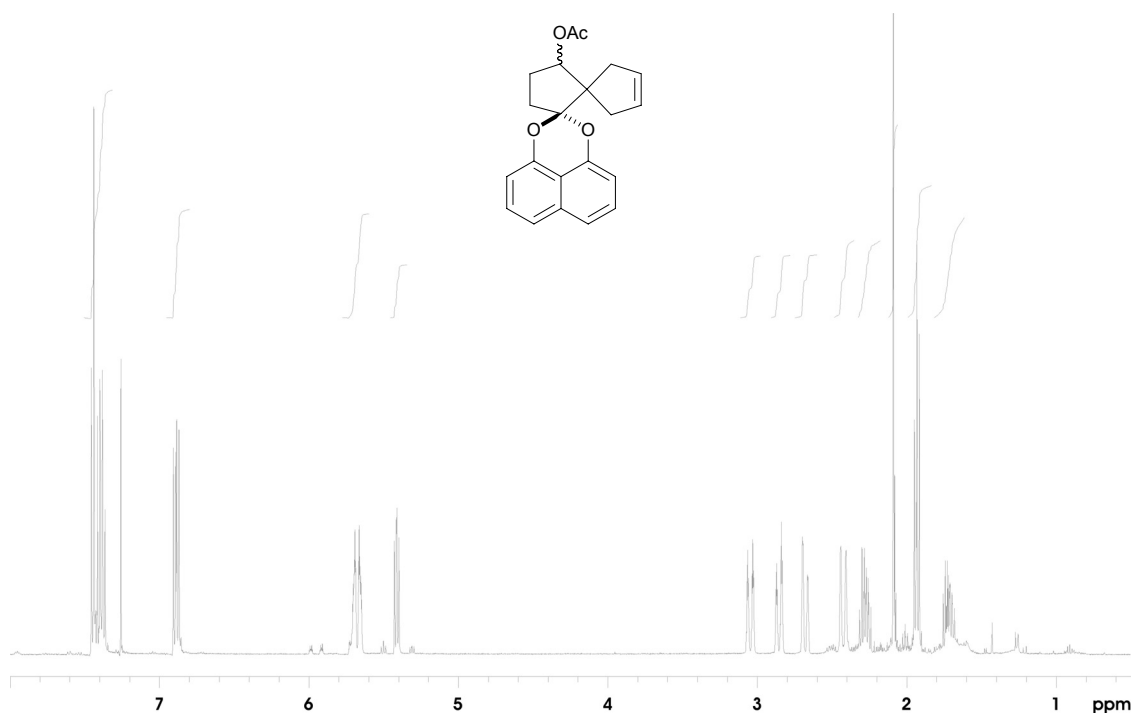

**Compound 9:**

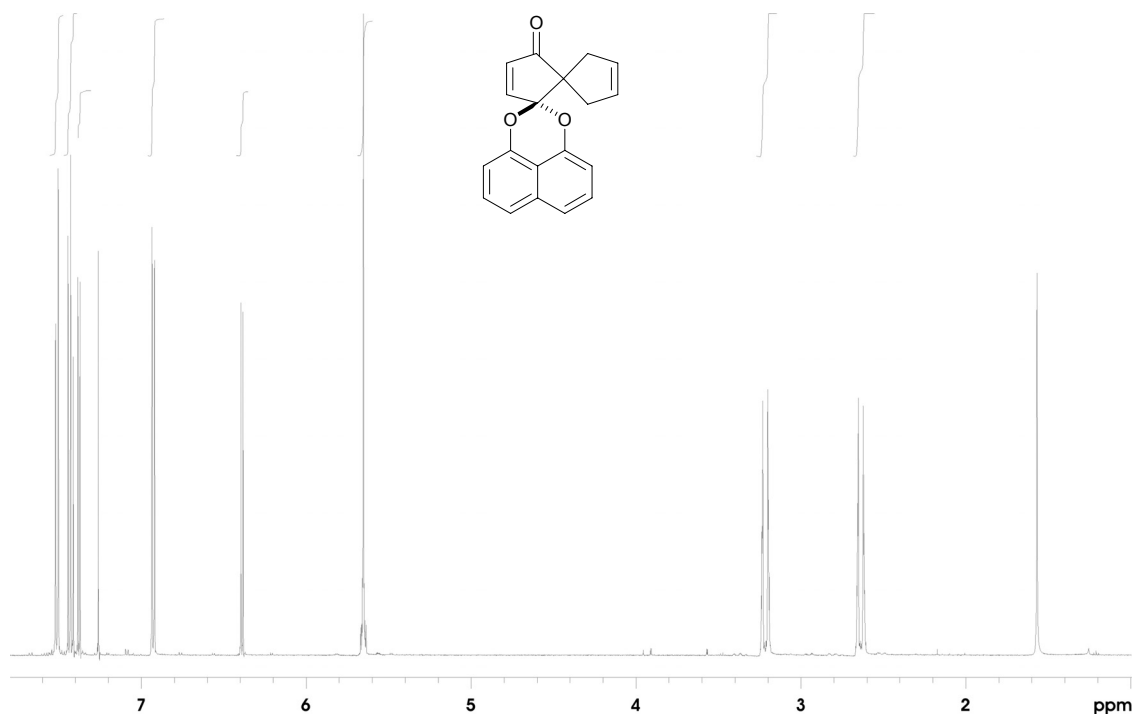

**Compound 10:**

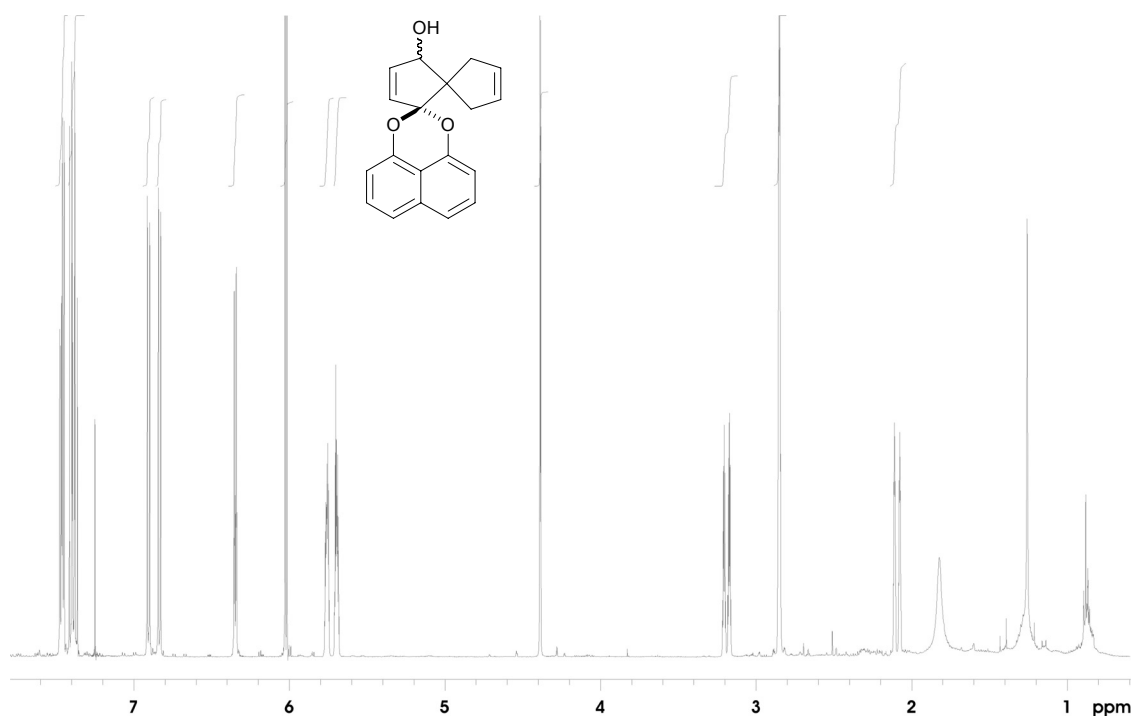

**Compound 11:**

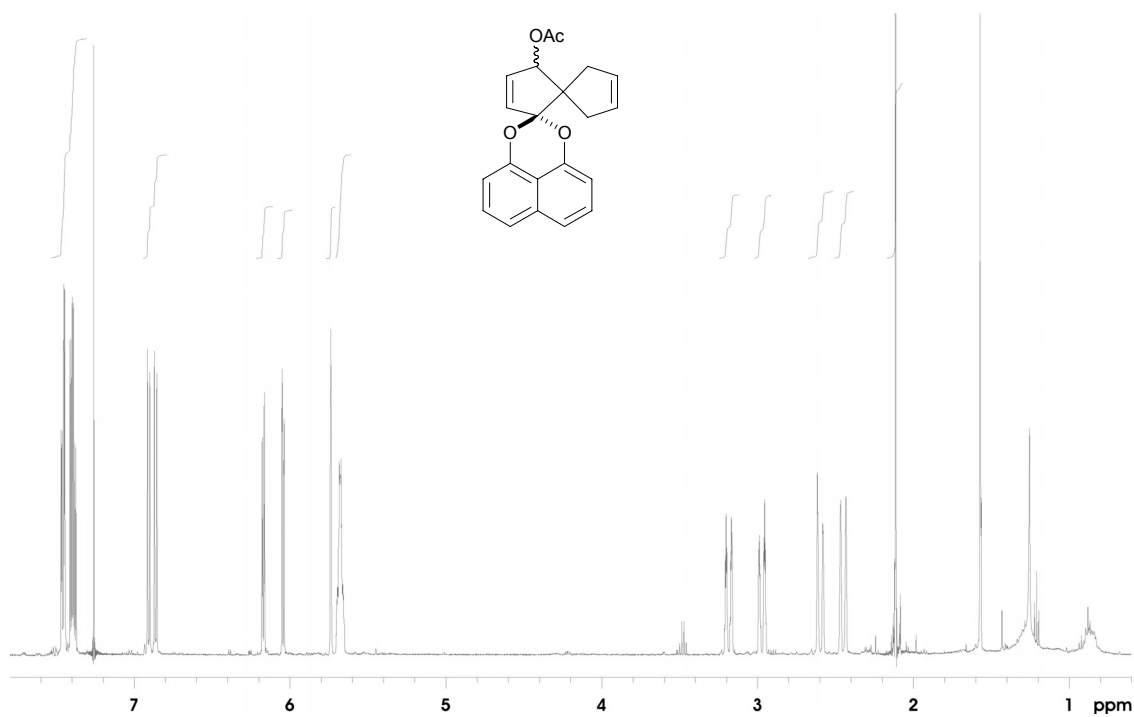

**Compound 13:**

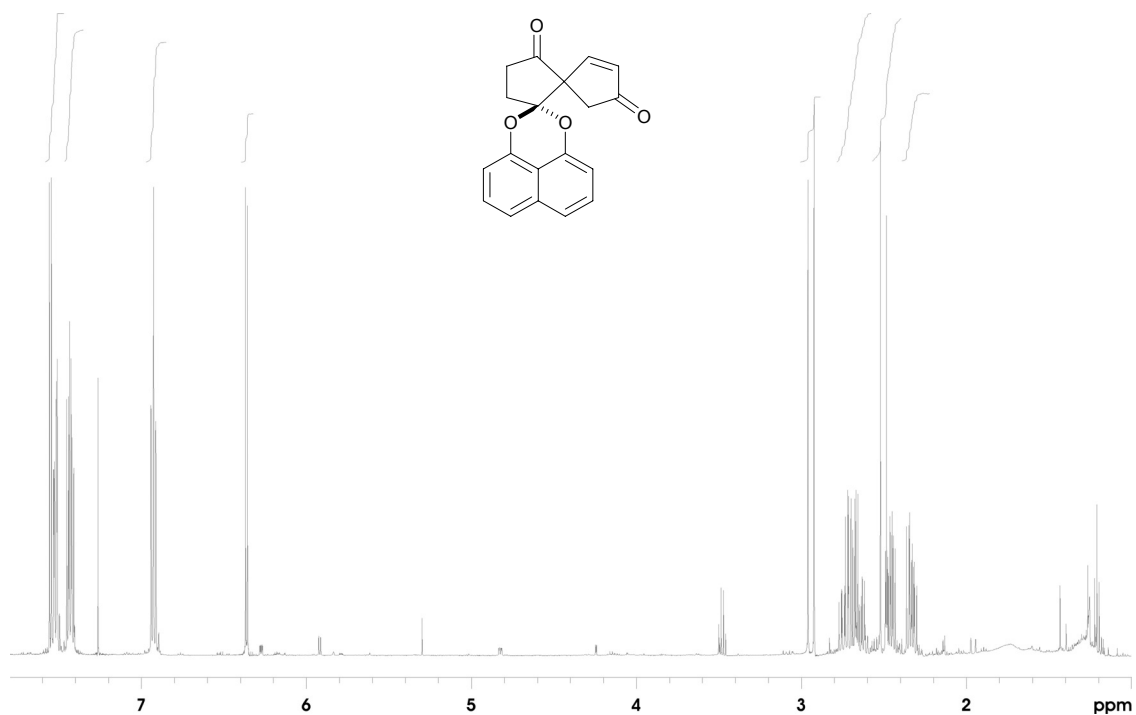

**Compound 14:**

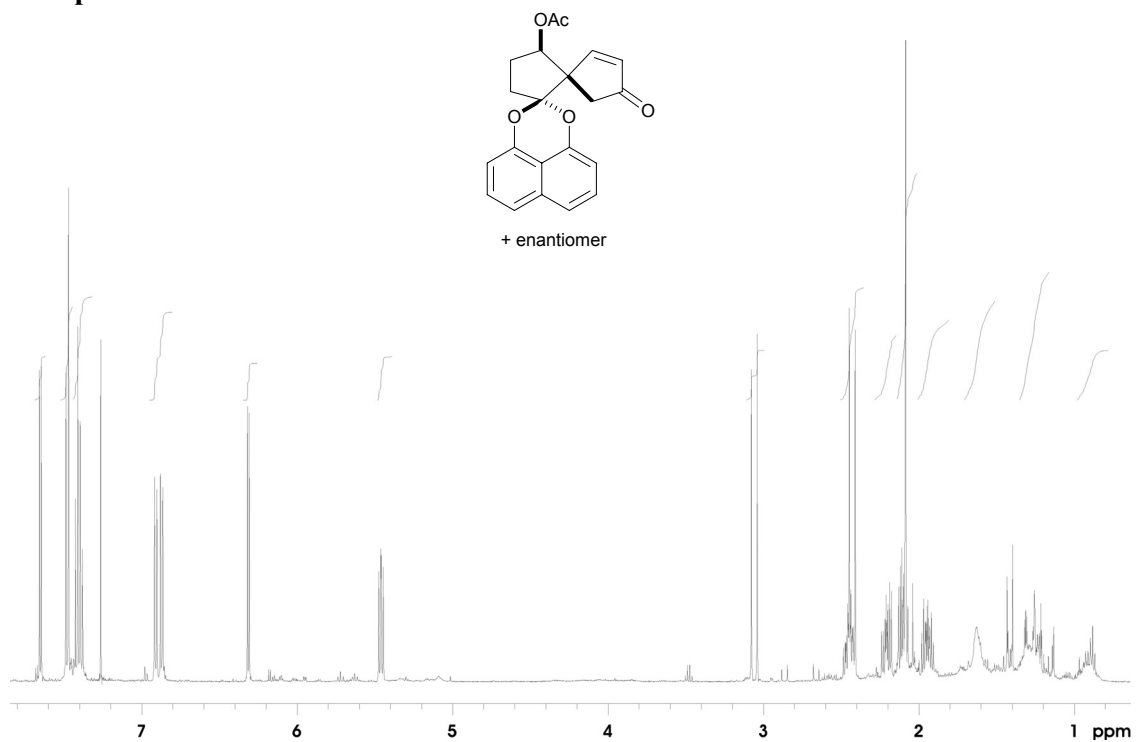

**Compound 15:**

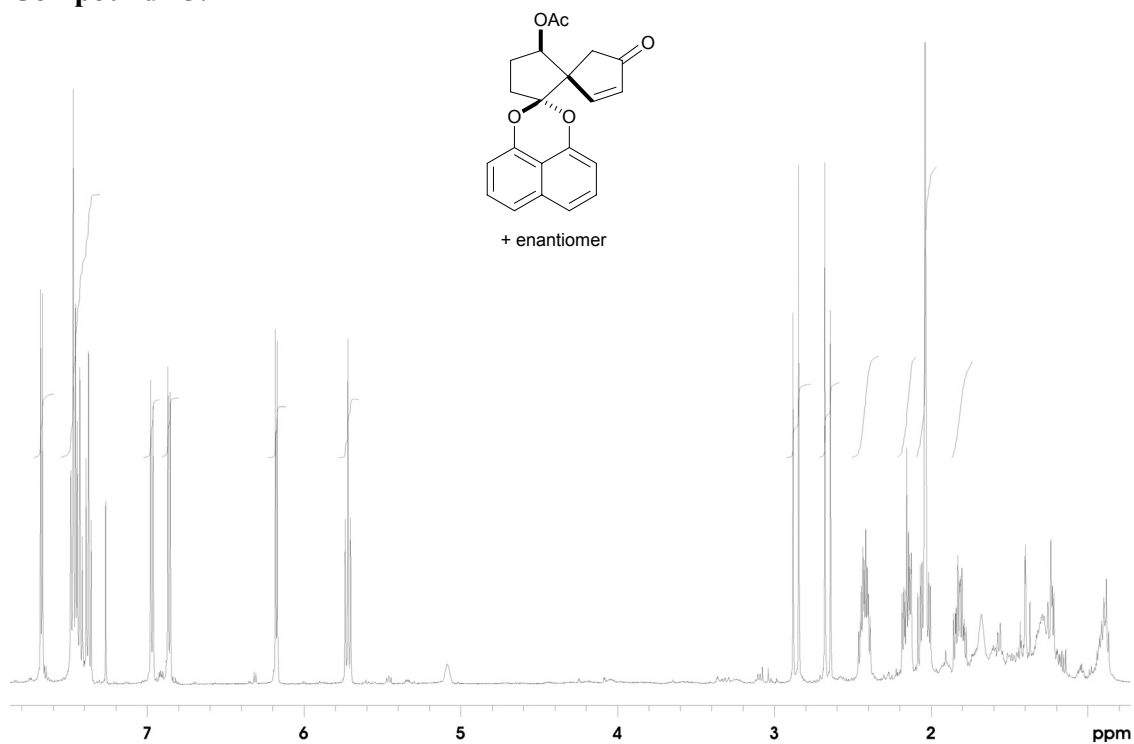

**Compound 16:**

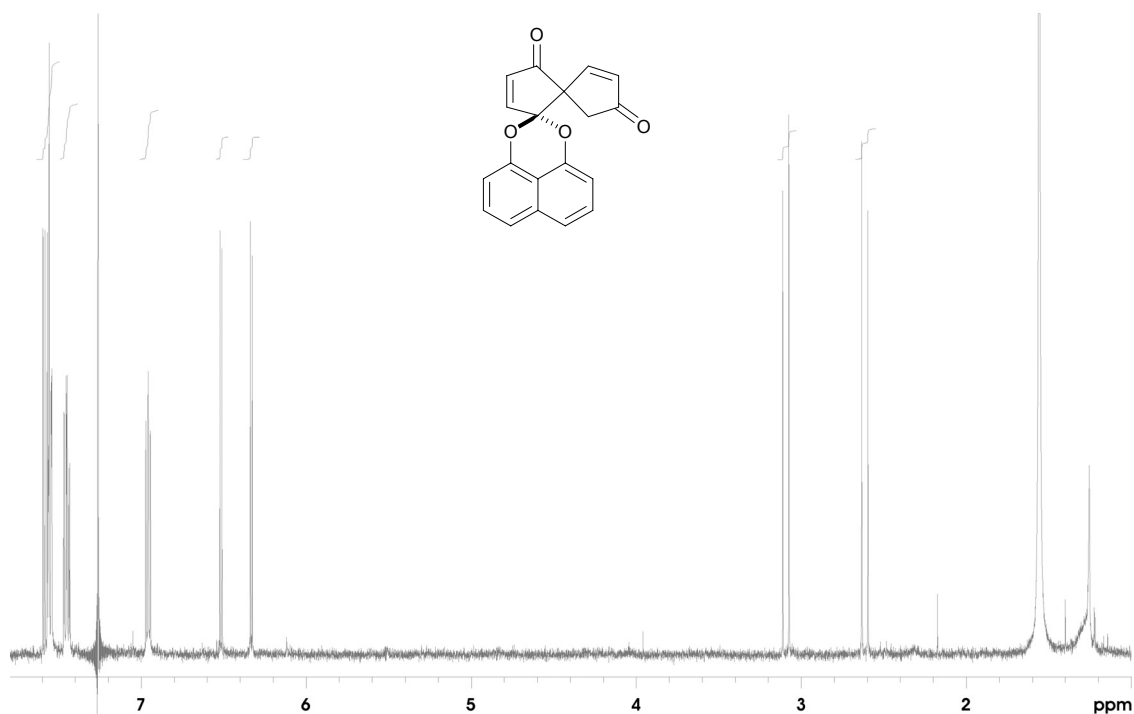

**Compound 17:**

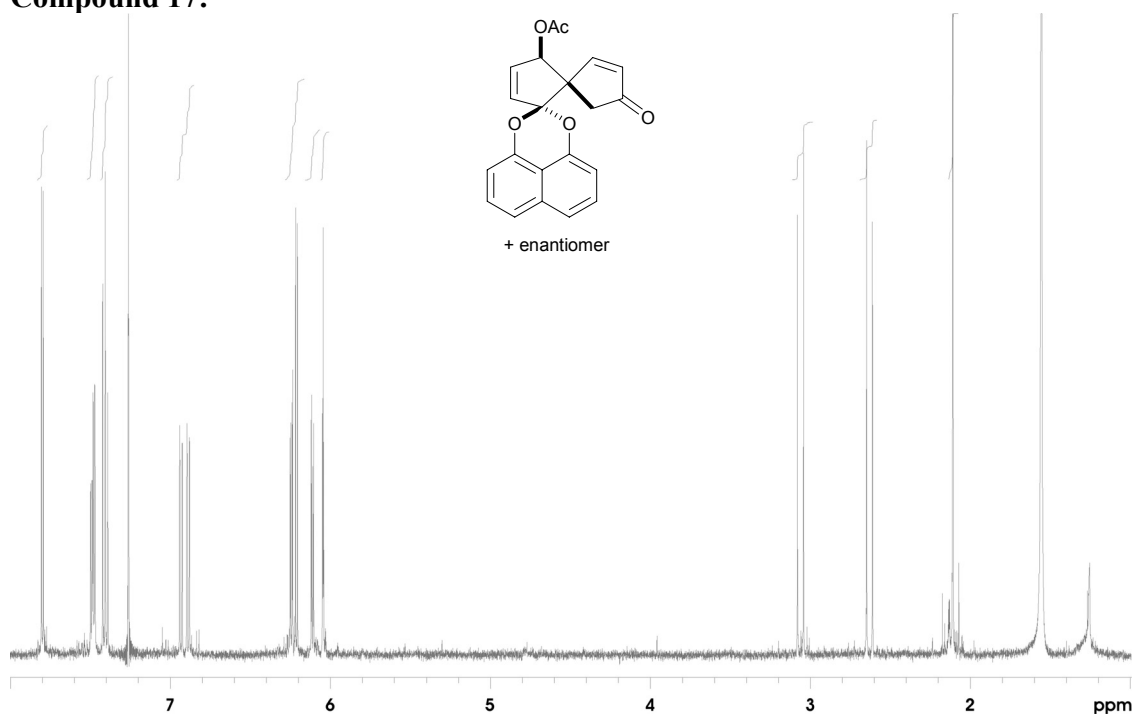

**Compound 18:**

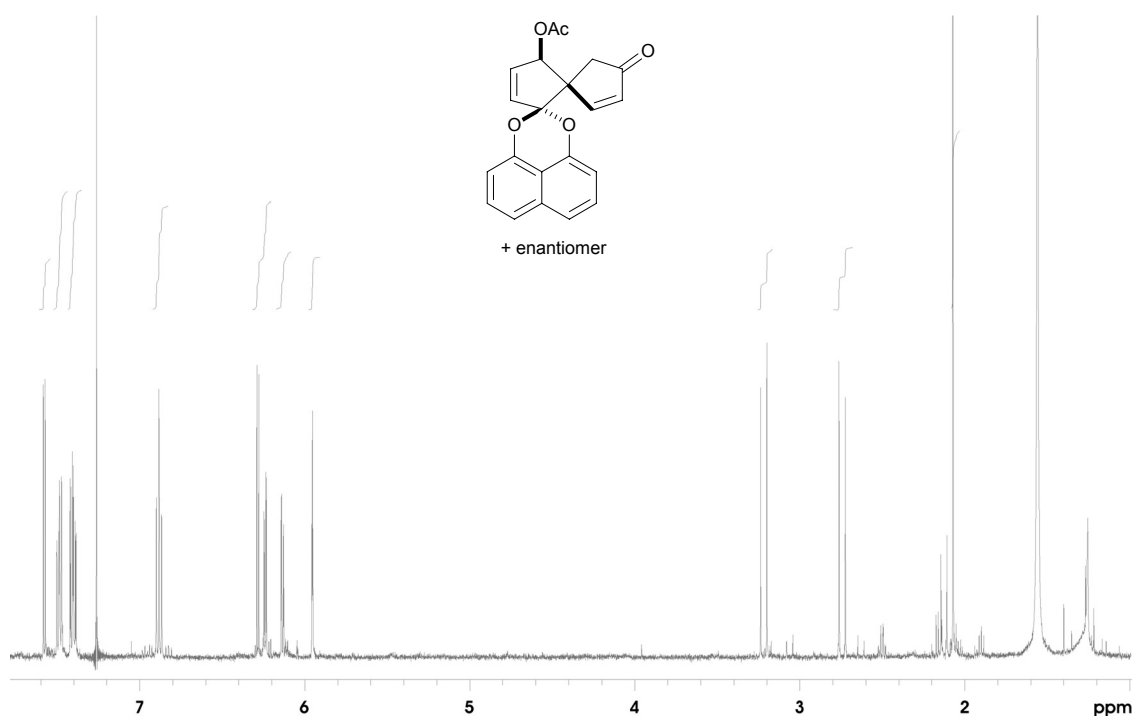

**Compound 19:**

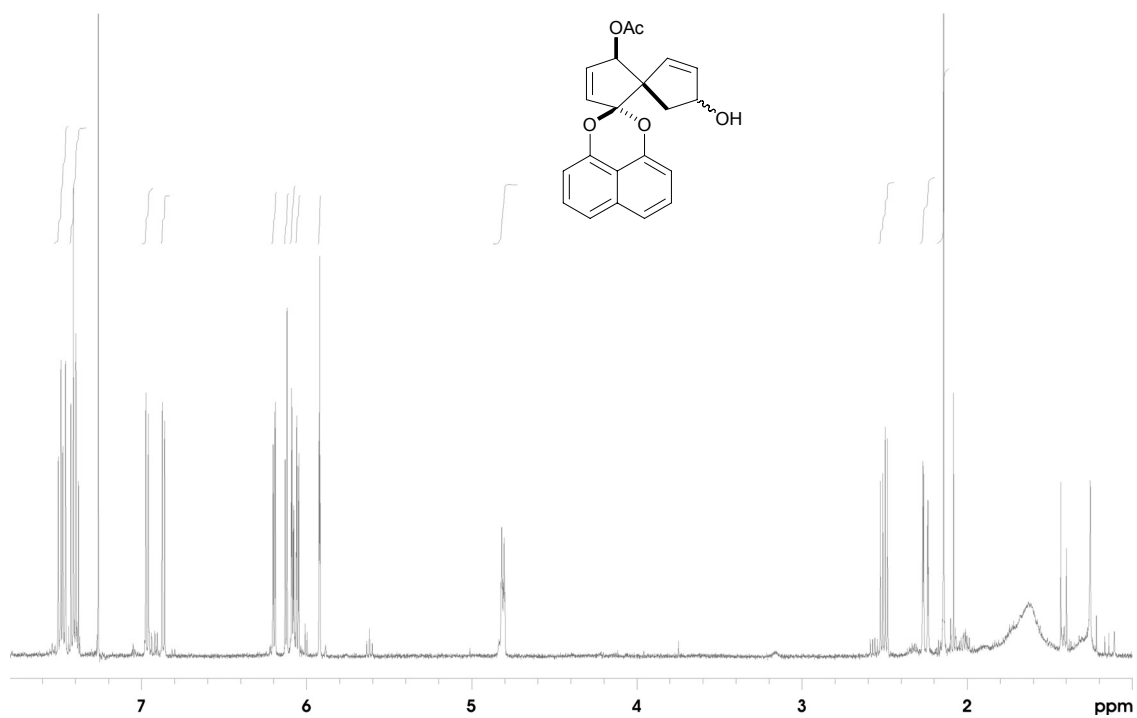

**Compound 20:**

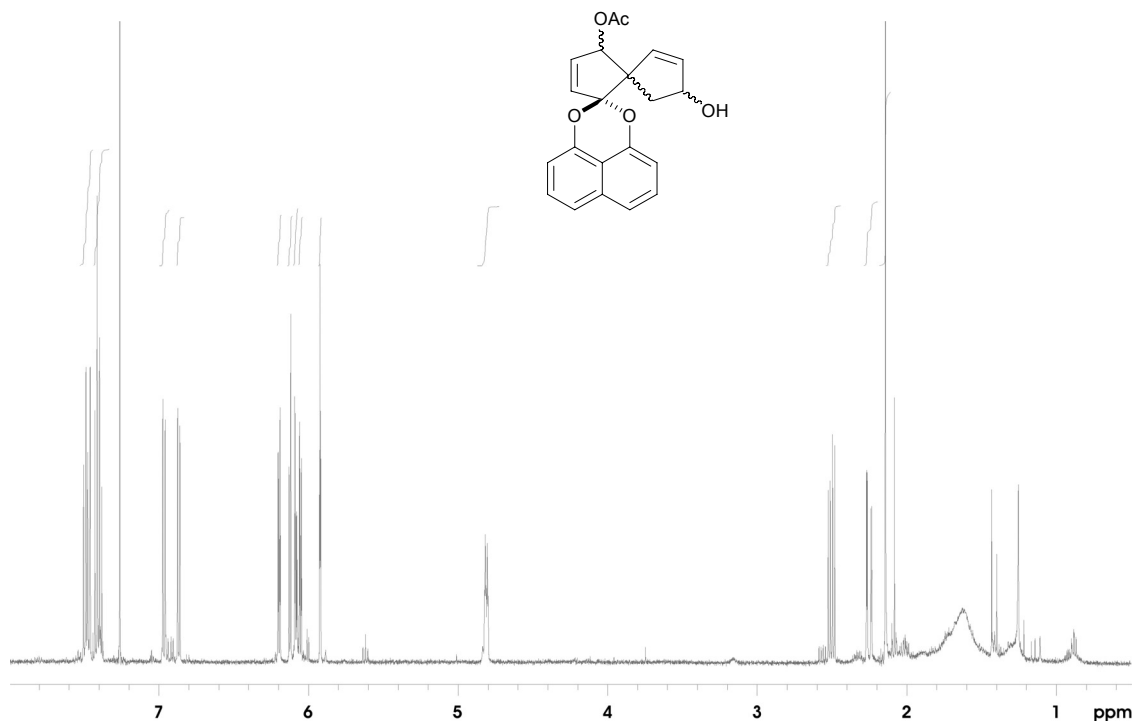



**Compound 21:**

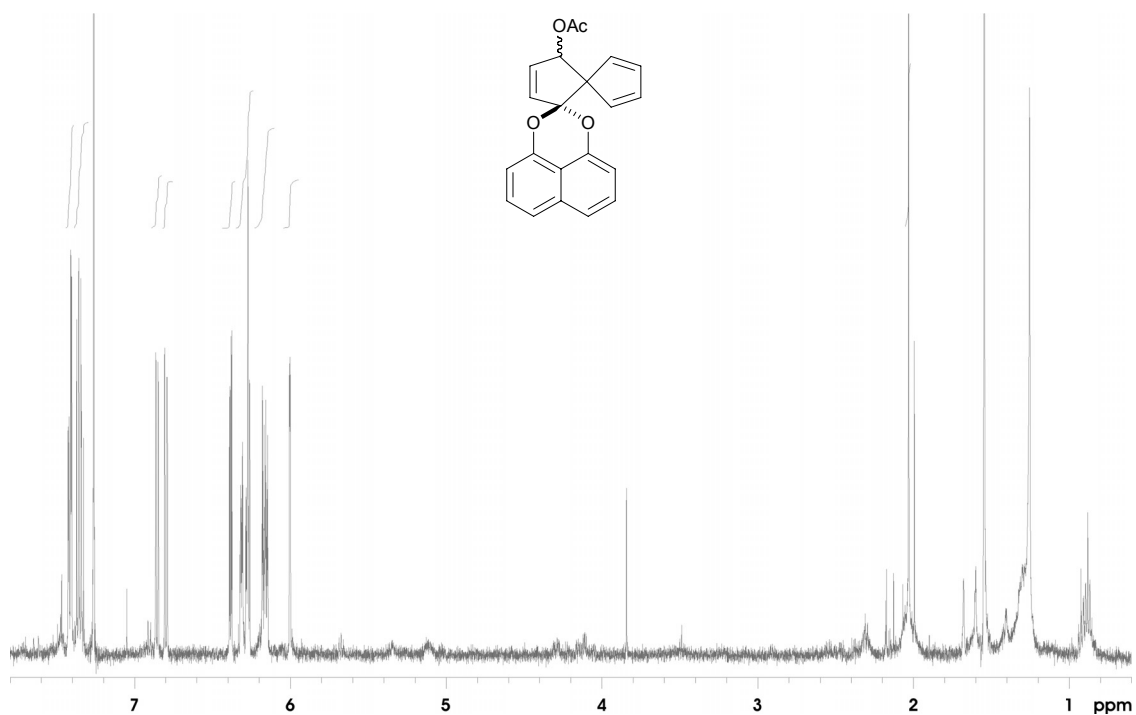

**Compound 22:**

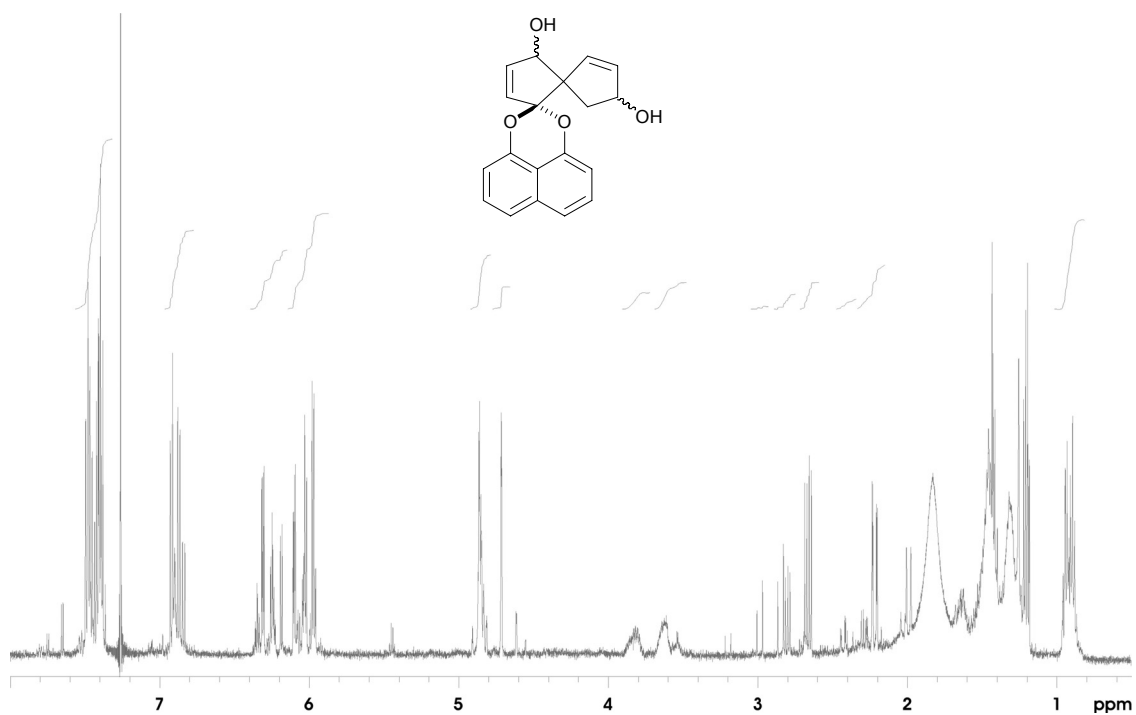

**Compound 23:**

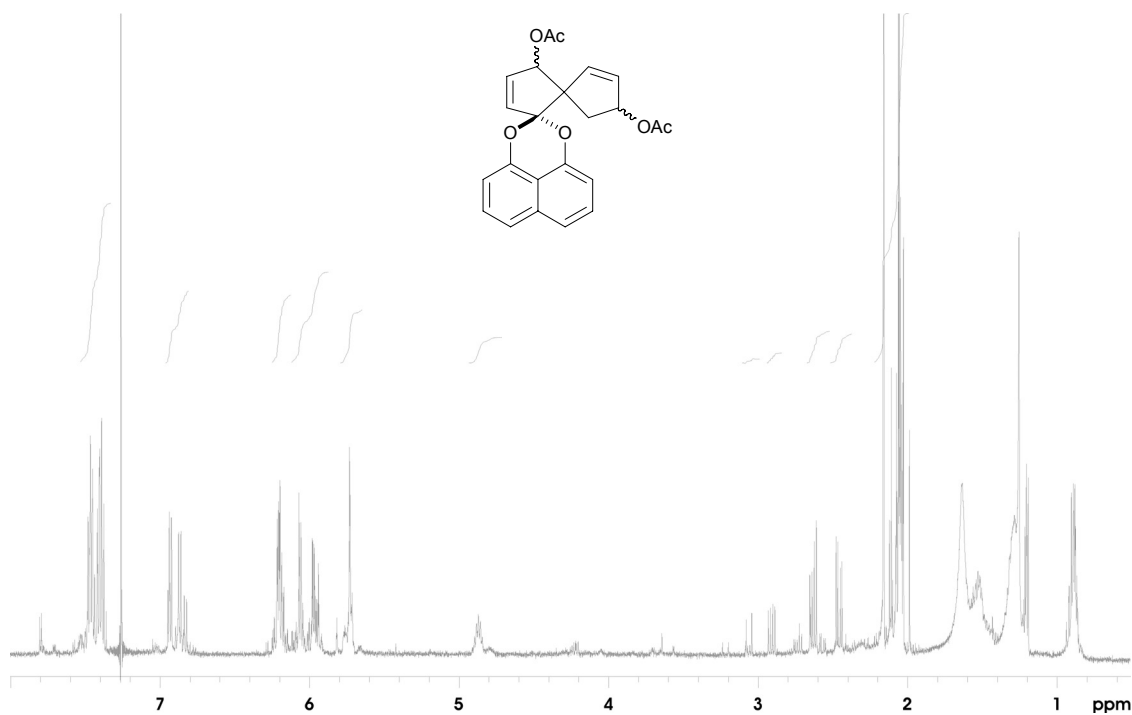

**Compound 24:**

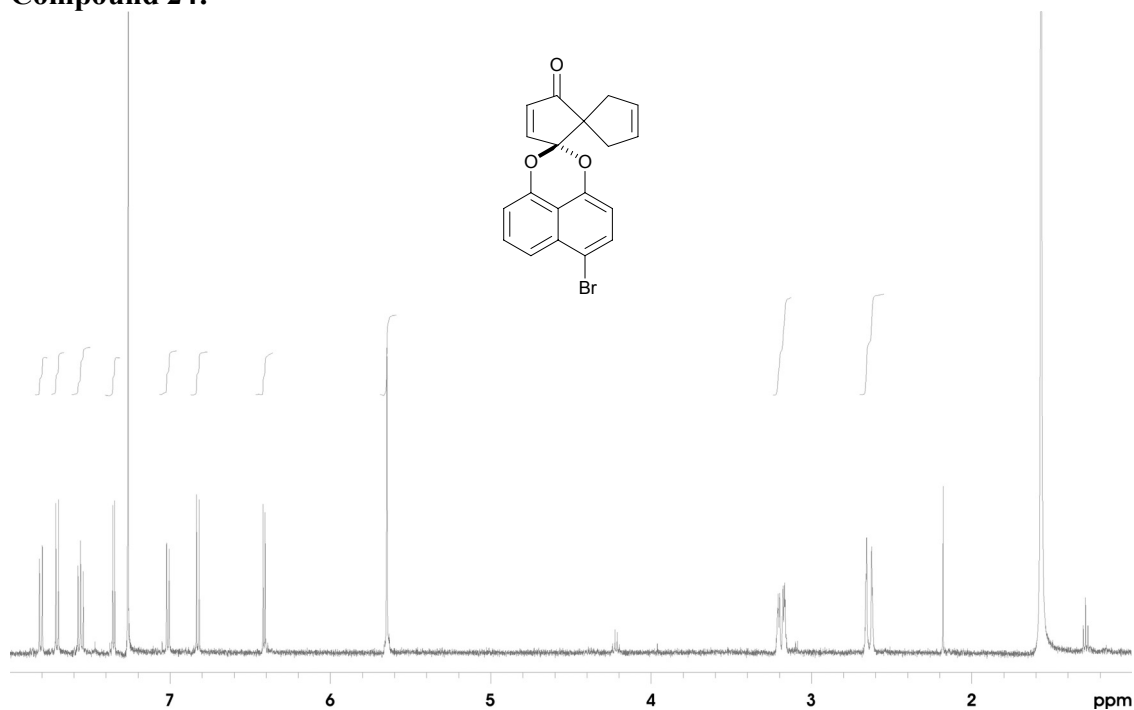

**Compound 25:**

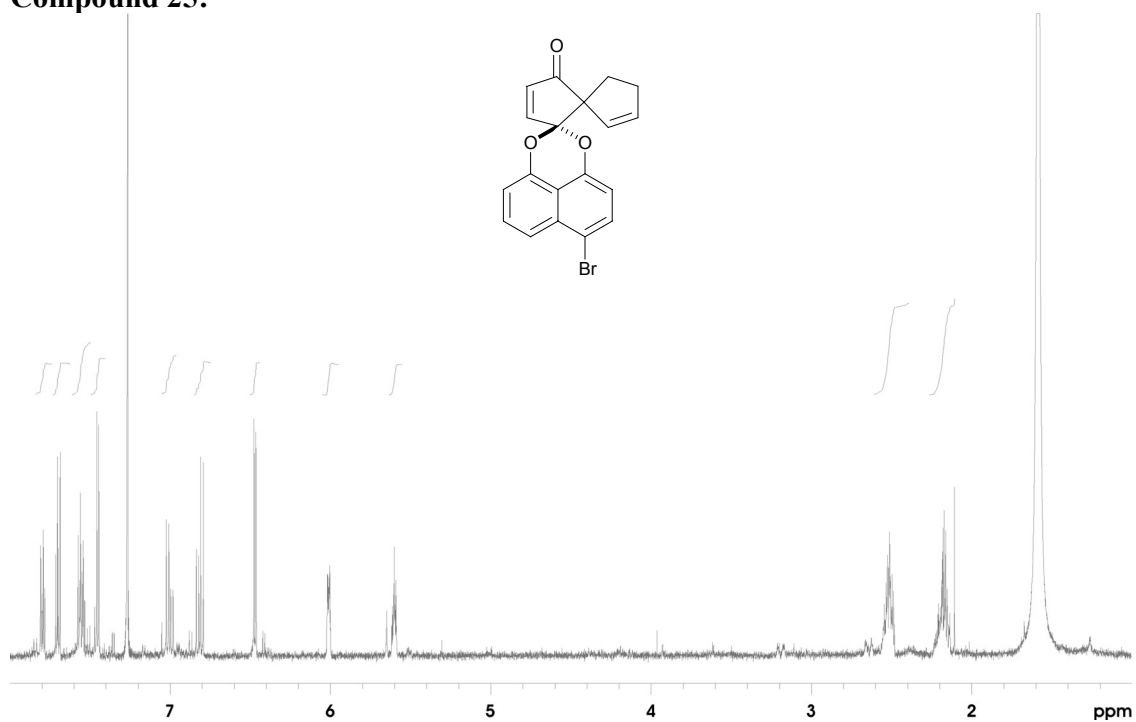

Supplement: b812263f.pdf [file b812263f.pdf]
